# 1 Neutrophil and natural killer cell imbalances prevent 2 muscle stem cell mediated regeneration following 3 murine volumetric muscle loss

4 Jacqueline A. Larouche<sup>1,2</sup>, Sarah J. Kurpiers<sup>1</sup>, Benjamin A. Yang<sup>1,2</sup>, Carol Davis<sup>3</sup>, Paula  
5 M. Fraczek<sup>1,2</sup>, Matthew Hall<sup>1</sup>, Susan V. Brooks<sup>1,3</sup>, Lonnie D. Shea<sup>1</sup>, Carlos A. Aguilar<sup>1,2,4,\*</sup>

6  
7 <sup>1</sup>Dept. of Biomedical Engineering, University of Michigan, Ann Arbor, MI 48109, USA.

8 <sup>2</sup>Biointerfaces Institute, University of Michigan, Ann Arbor, MI 48109, USA. <sup>3</sup>Department  
9 of Molecular & Integrative Physiology, University of Michigan, Ann Arbor, MI 48109,  
10 USA. <sup>4</sup>Program in Cellular and Molecular Biology, University of Michigan, Ann Arbor, MI  
11 48109, USA.

12 \*To whom correspondence should be addressed: [caguilar@umich.edu](mailto:caguilar@umich.edu)

## 14 SINGLE SENTENCE SUMMARY

15 Comparison of muscle injuries resulting in regeneration or fibrosis reveals inter-cellular  
16 communication between neutrophils and natural killer cells impacts muscle stem cell  
17 mediated repair.

## 19 ABSTRACT

20 Volumetric muscle loss (VML) overwhelms the innate regenerative capacity of  
21 mammalian skeletal muscle (SkM), leading to numerous disabilities and reduced quality  
22 of life. Immune cells are critical responders to muscle injury and guide tissue resident  
23 stem cell and progenitor mediated myogenic repair. However, how immune cell infiltration  
24 and inter-cellular communication networks with muscle stem cells are altered following  
25 VML and drive pathological outcomes remains underexplored. Herein, we contrast the  
26 cellular and molecular mechanisms of VML injuries that result in fibrotic degeneration or  
27 regeneration of SkM. Following degenerative VML injuries, we observe heightened  
28 infiltration of natural killer (NK) cells as well as persistence of neutrophils beyond two  
29 weeks post injury. Functional validation of NK cells revealed an antagonistic role on  
30 neutrophil accumulation in part via inducing apoptosis and CCR1 mediated chemotaxis.  
31 The persistent infiltration of neutrophils in degenerative VML injuries was found to  
32 contribute to impairments in muscle stem cell regenerative function, which was also  
33 attenuated by transforming growth factor beta 1 (*TGFβ1*). Blocking *TGFβ* signaling  
34 reduced neutrophil accumulation and fibrosis, as well as improved muscle specific force.  
35 Collectively, these results enhance our understanding of immune cell-stem cell crosstalk  
36 that drives regenerative dysfunction and provide further insight into possible avenues for  
37 fibrotic therapy exploration.

## 1 BACKGROUND

2 The traumatic or surgical loss of a critical volume of skeletal muscle (SkM) that results  
3 in a permanent functional impairment<sup>1</sup>, known as volumetric muscle loss (VML), is  
4 responsible for over 90% of all muscle conditions that lead to long-term disability, and is  
5 the principle cause of nearly 10% of all medical retirements from the military<sup>2</sup>. VML results  
6 in reduced quality of life through pronounced disabilities<sup>3</sup> ranging from reduced muscle  
7 function and atrophy to aggressive development of osteoarthritis<sup>4</sup>. Increasing prevalence  
8 of extremity traumas during combat since the turn of the century has incentivized  
9 increased therapeutic development for VML<sup>5</sup>. Towards this end, research groups have  
10 developed and tested strategies ranging from acellular biological scaffolds<sup>6-8</sup> to stem cell  
11 transplants<sup>9</sup>, drug therapies<sup>3,10</sup>, and rehabilitation<sup>11</sup>, as well as various combinations of  
12 each<sup>12-14</sup>. However, each of these therapies have found limited success, with only an  
13 estimated 16% force recovery achieved<sup>13</sup>. These results may be due to the prolonged  
14 inflammation and inhibitive microenvironment produced by the fibrotic scar as a result of  
15 VML injury<sup>13,15,16</sup>. However, little information exists for why VML permanently overwhelms  
16 the regenerative capacity of SkM resulting in pathological fibrosis and degeneration.

17 The regenerative capacity of SkM is dependent upon a pool of resident muscle stem  
18 cells (MuSCs), also known as satellite cells<sup>17</sup>. Upon muscle injury, quiescent MuSCs are  
19 triggered to proliferate, differentiate into muscle progenitor cells, and fuse to form new or  
20 repair existing myofibers<sup>17</sup>. The immune system plays a complex role in communicating  
21 with MuSCs during the regenerative response and guides healing outcomes<sup>18,19</sup>.  
22 Following SkM damage, a wave of pro-inflammatory cells, including neutrophils,  
23 macrophages, and conventional T lymphocytes, infiltrate the injured site and encourage  
24 MuSC proliferation through pro-inflammatory cytokine secretion, while regulatory T  
25 cells<sup>20,21</sup> balance the magnitude and duration of the inflammatory response. Once the  
26 debris has been cleared and the progenitor pool has appropriately expanded, the immune  
27 microenvironment transitions to an anti-inflammatory state to coordinate matrix rebuilding  
28 and the formation of new myotubes. As part of this transition, macrophages undergo a  
29 phenotypic switch to support myogenic progenitor differentiation and myofiber growth<sup>22,23</sup>.  
30 However, after VML, macrophages persist in the defect for weeks to months<sup>13</sup> and their  
31 polarization switch is impaired<sup>24</sup> resulting in an intermediate phenotype<sup>25,26</sup>. Moreover,  
32 VML triggers an increase in T helper and cytotoxic T lymphocytes<sup>27</sup>, which persist as long  
33 as 4 weeks post injury<sup>26</sup> compared to returning to pre-injury levels within 7-10 days, as  
34 occurs in models of successful muscle regeneration<sup>28</sup>. Comprehensive etiological  
35 assessment after VML and how dysregulated immune signaling networks converge to  
36 influence MuSC functions remains enigmatic. Elucidating these mechanisms stands to  
37 potentiate the development of regenerative therapies.

38 Herein, we characterized the cellular and molecular mechanisms driving responses of  
39 SkM by comparing VML injuries that regenerate to those that degenerate and result in  
40 fibrosis. Using immunohistochemical analyses, single-cell RNA sequencing (scRNA-  
41 Seq), lineage-tracing mouse models, cellular transplants, and small molecule inhibition,  
42 we provide a resource that elucidates new cellular and molecular players post VML. We  
43 observed and validated degenerative VML injuries result in persistent infiltration of  
44 inflammatory cells, such as neutrophils, which exert lasting consequences on myogenic  
45 capacity of resident MuSCs. Further, we identified and characterized an inter-cellular  
46 communication circuit between neutrophils and cytolytic natural killer (NK) cells, which

1 combat neutrophil accumulation via a CCL5/CCR1 axis. Inhibition of CCR1 exacerbated  
2 neutrophil accumulation in degenerative defects, while NK transplants significantly  
3 reduced neutrophil populations and enhanced healing. Finally, cell-cell communication  
4 network prediction from scRNA-Seq data suggested TGF $\beta$ -conferred MuSC impairments.  
5 Small molecule inhibition of TGF $\beta$  signaling in vivo improved tissue morphology and  
6 strength at late timepoints following degenerative VML injuries. Together, these findings  
7 enhance our understanding of cellular communication dynamics governing muscle  
8 healing outcomes.

## 9 **RESULTS**

### 10 *Volumetric muscle loss induces muscle degeneration and fibrotic supplantation*

11 To model regenerative and degenerative muscle healing outcomes, we administered  
12 bi-lateral full-thickness 2mm and 3mm punch biopsy defects to the rectus femoris of adult  
13 C57BL6/J mice<sup>29</sup>. Cross-sections of mouse quadriceps were stained with hematoxylin  
14 and eosin (H&E), picosirius red (PSR), and immunohistochemically stained for laminin  
15 at 7-, 14-, 28-, and 42-days post injury (dpi) to assess muscle degeneration and fibrosis  
16 compared to uninjured controls. Consistent with previous literature<sup>29</sup>, the 3mm muscle  
17 defects failed to resolve by 42-dpi (subsequently termed degenerative defects), whereas  
18 regenerating myofibers filled 2mm defects (subsequently termed regenerative defects) by  
19 28-dpi (Figure 1a). Compared to regenerative defects, degenerative defects were further  
20 characterized by higher proportions of smaller fibers (Figure 1b, n = 5-7 tissues from 3-4  
21 mice) and significantly increased collagen deposition at 28- and 42-dpi (Figure 1c-d,  
22 Supp. Fig. 1, n = 3-7 tissues from 3-4 mice, unpaired). Combining these results shows  
23 VML defects of different sizes beget distinct regenerative trajectories.

24

### 25 *Single cell RNA sequencing reveals alterations in cellular ecosystem in response to* 26 *degenerative muscle defects*

27 To probe the cellular and molecular drivers that contribute to the regenerative versus  
28 degenerative responses, we performed droplet-based scRNA-Seq on viable  
29 mononucleated cells isolated from uninjured quadriceps (0-dpi) as well as 7-, 14-, and  
30 28-dpi (Figure 2a). We generated 58,405 high-quality scRNA-Seq libraries encompassing  
31 on average 1,875 genes per cell with an average read depth of 7,489 unique molecular  
32 identifiers (UMIs) per cell (Supp. Fig. 2a-b). Technical variations between batches were  
33 regressed out using Seurat v3<sup>30</sup>, followed by dimensionality reduction using Uniform-  
34 Manifold Approximation and Projection (UMAP)<sup>31</sup> (Supp. Fig. 2c). Unsupervised Louvain  
35 clustering revealed 23 cell types (Figure 2b). Cluster-based cell-type annotation was  
36 performed by matching cluster marker genes to a muscle-specific cell taxonomy  
37 reference database using single cell Cluster-based Annotation Toolkit for Cellular  
38 Heterogeneity (scCATCH)<sup>32</sup> as well as by overlaying marker gene expression with  
39 previously published reference datasets<sup>33-35</sup> (Supp. Fig. 2d). We observed variation in  
40 the proportion and type of captured cells among degenerative defects compared to  
41 regenerative defects, whereby increases in neutrophils and lymphocytes were observed  
42 in degenerative defects at 7- and 14-dpi compared to cells sequenced from regenerative  
43 defects at the same time points (Figure 2c-d). Merging all time points, scRNA-Seq results

1 suggested a 4-5-fold increase in lymphocytes and neutrophils among degenerative  
2 defects (Figure 2e). Further, substantial differences in gene expression were observed  
3 among most cell populations isolated from degenerative versus regenerative defects  
4 using the MAST toolkit<sup>36,37</sup> (Figure 2f). PANTHER<sup>38</sup> pathway analysis on the top 150  
5 DEGs upregulated among degenerative defects identified increased chemokine and  
6 cytokine mediated inflammation (*Il1b*, *Ccl5*, *Ccr7*, *Ccr1*, *Rac2*, *Acta1*, *Actb*, *Actc1*, *Actg1*,  
7 *Arpc3*, and *Alox5ap*), T and B lymphocyte activation (*Trbc2*, *MHCII antigens*, *Cd3d*,  
8 *Cd79a* and *b*, *Ighm*, and *Rac2*), glycolysis (*Aldoa*, *Gapdh*, *Pgam2*, and *Bpgm*), and  
9 apoptosis signaling (*Ltb*, heat shock proteins, and *Cyca*). Most of these genes were  
10 expressed among dendritic cells (*Il1b*, *Ccr7*, *Rac2*, *Alox5ap*), neutrophils (*Il1b*, *Ltb*, *Ccr1*,  
11 *Alox5ap*), T/NK cells (*Ccl5*, *Ltb*, *Rac2*, *Cd3d*, *Trbc2*, and heat shock proteins), and B cells  
12 (*Rac2*, *Ccr7*, *Ltb*, *Cd79*, *Ighm*). We validated the proportions of T cells and NK cells using  
13 flow cytometry from regenerative and degenerative defects after 7-dpi and observed  
14 largely similar scRNA-Seq cell abundances (Supp. Fig. 3a-b, n = 6 muscles from 3 mice,  
15 unpaired). These results suggest degenerative VML defects induce stronger and  
16 sustained inflammatory responses compared to VML injuries that heal.

17

### 18 *Degenerative VML injuries result in variations of inflammatory cell infiltration*

19 Our scRNA-Seq results predicted increases in neutrophils in degenerative injuries,  
20 which play a primary role in clearance of tissue debris after injury and secrete a myriad  
21 of pro-inflammatory cytokines and chemokines to recruit and activate inflammatory  
22 macrophages and T lymphocytes before being rapidly cleared<sup>19,39</sup>. To validate these  
23 predictions, we isolated neutrophil populations (CD11b<sup>+</sup>Ly6G<sup>+</sup>) after multiple time points  
24 following regenerative and degenerative injuries and enumerated their fractions using  
25 flow cytometry (Figure 3a). Consistent with our scRNA-Seq observations, we observed  
26 significant increases in neutrophil counts for degenerative VML injuries at 3- and 7-dpi  
27 and a trend towards increased neutrophils at 14-dpi (Figure 3b, Supp. Fig. 3c, n = 5-6  
28 tissues from 5-6 mice, paired). To understand the mechanisms governing neutrophil  
29 accumulation following degenerative VML injuries, we employed the recently developed  
30 NicheNet<sup>40</sup> algorithm. NicheNet integrates prior knowledge on ligand-target pathways  
31 with transcriptomic expression data to predict influential ligands, match them with target  
32 genes (which we defined according to differential expression across defects), and identify  
33 possible signaling mediators. NicheNet predicted that one of the top ligand-receptor  
34 interactions driving neutrophil responses in 3mm defects was CCL5/CCR1 signaling  
35 (Figure 3c). CCL5 was expressed almost exclusively in NK and T cells, while CCR1 was  
36 most highly expressed in neutrophils (Figure 3d). While over 4-fold increases in all  
37 lymphocyte sub-types were observed in degenerative defects from our scRNA-Seq data,  
38 one of the largest lymphocyte populations, and the primary source of CCL5, was NK cells  
39 (Figure 3d, Supp. Fig. 4a-b). To confirm the increased influx of NK cells into degenerative  
40 defects, we performed flow cytometry on degenerative and regenerative muscle defects  
41 at 7-dpi (Figure 3e-f, n = 6 tissues from 3 mice, unpaired) and observed about 4 times as  
42 many NK cells in degenerative defects compared with regenerative defects, which only  
43 slightly decreased after saline perfusion. Moreover, qualitative immunohistochemical  
44 stains revealed NK cells are situated at the periphery of the VML defects (Figure 3g, n =  
45 6 tissues from 3 mice, unpaired).

1 NK cells rapidly produce and secrete pro-inflammatory cytokines<sup>41</sup> and have  
2 previously been reported in SkM<sup>21,42,43</sup>, though their roles remain undefined. In addition  
3 to numerous NK cell marker genes (*Ncr1*, *Nkg7*, *Klre1*, *Klra8*, *Klra8*)<sup>44</sup>, differential gene  
4 expression analysis revealed elevated expression of pro-inflammatory molecules (*Gzma*,  
5 *Gzmb*, *Fcer1g*) and chemokines (*Ccl3*, *Ccl4*, *Ccl5*) among NK cells compared with the  
6 recovered T and NKT cells (Supp. Fig. 4c). Additionally, NK cells were observed to display  
7 strong expression of genes associated with activation and cytolytic function (*Ncr1*, *Klrk1*,  
8 *Gzma*, *Gzmb*, *Fasl*) and cytokine-secretion (*Klrc1*, *Ifng*, *Ltb*) (Supp. Fig 4d). Summing  
9 these results shows NK cells and neutrophils display enhanced infiltration following  
10 degenerative VML injuries and may communicate via a CCL5-CCR1 circuit.

11

### 12 *NK cells interact with neutrophils in degenerative VML injuries*

13 To elucidate the impact of NK cells on neutrophils in VML injuries, we first co-cultured  
14 neutrophils isolated from degenerative VML defects 7-dpi with activated NK cells.  
15 Consistent with studies showing human NK cells induce contact-dependent neutrophil  
16 apoptosis<sup>45</sup>, we observed significantly increased neutrophil apoptosis after 4 hours  
17 (Figure 4a, Supp. Fig. 5a, n = 6 wells using neutrophils from 4 mice, unpaired). To  
18 determine whether such communication could be occurring in vivo, we next  
19 immunohistochemically evaluated co-localization of NK cells and neutrophils within VML  
20 defects at 7dpi. Over 90% of NK cells were within 50um of the nearest neutrophil, which  
21 is within previously reported maximum cytokine propagation distances up to 250 microns  
22 depending on the density of receptors<sup>46,47</sup> (Figure 4b-c, n = 159 NK cells and 397  
23 neutrophils, from 4 defects). These results suggest NK cells induce neutrophil apoptosis  
24 and are proximal to neutrophils after degenerative VML injuries.

25 Given our results that NK cells had transcriptional profiles aligning with a cytolytic  
26 phenotype and induced neutrophil apoptosis in vitro, we reasoned that NK cell  
27 transplantation into VML defects would reduce neutrophil abundance (Figure 4d). We  
28 transplanted 150,000 *in vitro* activated NK cells into VML injured muscle at 7-dpi and  
29 quantified neutrophils and NK cells at 14-dpi using flow cytometry (Supp. Fig. 5b-c).  
30 Though the transplanted NK cells had largely cleared by 14-dpi (Supp. Fig. 5d, n = 3  
31 tissues from 3 mice, paired), we observed a significant reduction of neutrophils in  
32 response to NK cell transplantation (Figure 4e, n = 6 tissues from 6 mice, paired). To  
33 determine if implanting NK cells impacted subsequent muscle regeneration, we  
34 histologically assessed tissues at 28-dpi. We detected increased muscle mass at 28-dpi  
35 (Figure 4f, n = 4 tissues, paired) as well as a shift towards larger myofiber minimum Feret  
36 diameters (Figure 4g, n = 4 tissues from 4 mice, paired).

37 To glean if NK-neutrophil communication occurs through CCR1 signaling, we  
38 administered a small molecule CCR1 inhibitor, J-113863, daily (Figure 4h). At 14-dpi, we  
39 observed a substantial increase in neutrophil abundance (Figure 4i, n = 4 tissues from 4  
40 mice, unpaired) without significant changes to overall immune cell (CD45<sup>+</sup>) abundances  
41 (Supp. Fig. 5e, n = 4 tissues from 4 mice, unpaired). Taken together, these results  
42 suggest that after VML injury NK cells reduce neutrophil abundance through contact-  
43 mediated apoptosis, and that this effect is in part regulated or reinforced by CCR1  
44 signaling.

1

## 2 *Degenerative VML injuries engender impairments in muscle progenitor fusion*

3 The persistence of neutrophils after injury can have deleterious consequences for  
4 tissue repair, and failure to appropriately clear these cells from the injury site can lead to  
5 secondary damage as well as inefficient regeneration<sup>19,39,48</sup>. To deduce whether MuSCs  
6 may be responding to the neutrophil secretome in vivo, we sought to colocalize  
7 neutrophils with MuSCs or their progeny following VML injury. Towards this end, we  
8 administered 3mm VML defects to adult *Pax7<sup>cre</sup>* x *Rosa26<sup>mTmG</sup>* mice, which express  
9 membrane tagged green fluorescent protein (GFP) in all *Pax7<sup>+</sup>* cells and their progeny  
10 following tamoxifen induction. At 14-dpi, we collected the quadriceps and  
11 immunohistochemically stained for neutrophils (Ly6G), laminin, and nuclei (Figure 5a).  
12 We observed Ly6G<sup>+</sup> cells interspersed among or adjacent to GFP<sup>+</sup> regenerating  
13 myofibers (Figure 5b, n = 382 neutrophils and 410 GFP<sup>+</sup> fibers from 20x images of 4  
14 defects). To understand the potential consequences of prolonged exposure of myogenic  
15 progenitors to the neutrophil secretome in the context of degenerative VML injuries, we  
16 cultured immortalized myoblasts (C2C12s) with neutrophil-conditioned growth medium  
17 for a short (1-day) or long (8-days) period, then induced differentiation and fusion (Figure  
18 5c). We reasoned that the short exposure would mimic the quick inflammatory burst that  
19 follows regenerative defects, while the long exposure would mimic the observed  
20 significant increase in neutrophil presence beyond 7-dpi among degenerative defects. As  
21 a result of prolonged exposure to the neutrophil secretome, we observed a reduction in  
22 myoblast fusion (Figure 5d-e, n = 30 images from 3 culture wells, unpaired). Based on  
23 the observed impairments even in the absence of conditioned media during differentiation  
24 and fusion, we enriched MuSCs from degenerative and regenerative defects 28-dpi, after  
25 inflammation had largely resolved, and evaluated their ability to differentiate and fuse. We  
26 observed reductions in fusion (Figure 5f-g, n = 20 images from 5 culture wells, unpaired)  
27 among MuSCs enriched from degenerative defects compared to those enriched from  
28 regenerative defects. The negative changes in fusion were not results of differentiation  
29 impairments, as *Myog* expression was higher among MuSCs from degenerative defects  
30 compared to regenerative defects (Figure 5h, n = 3-4 culture wells, unpaired). Integrating  
31 these results demonstrates that MuSC differentiation is not impaired following VML, but  
32 fusion is partly inhibited, and that this effect may be partially conferred by extended  
33 exposure to the neutrophil secretome.

34 To glean drivers of impairments to MuSC fusion between degenerative and  
35 regenerative defects, we analyzed differential gene expression among the MuSC scRNA-  
36 Seq cluster. The largest number of differentially expressed genes (DEGs) across all  
37 timepoints and both defects were observed among MuSCs harvested from degenerative  
38 defects at 7-dpi (455 genes, log-fold change > 1.5, adjusted p-value < 0.05). Among  
39 degenerative defects, the most upregulated genes (ordered according to adjusted p  
40 values) were associated with myogenic progenitor activation (*Itm2a*, *Cdkn1c*, *Ckb*<sup>49</sup>,  
41 *Atp2a1*, *Cebpb*<sup>50,51</sup>), metabolism (*Mt1* and *Mt2*<sup>52</sup>, *Gamt*, *Socs3*), fibrosis (*Sparc*)<sup>53</sup>, stress  
42 response, and inflammation (*Fos*, *Fosb*, *Jun*, *S100a8*, *S100a9*, *Prdx5*, *Mif*<sup>54</sup>) (Supp. Fig.  
43 6a). PANTHER<sup>38</sup> pathway analysis displayed enriched terms for regulation of apoptosis  
44 (17.0% of upregulated genes), increased regulation of metabolism (35.7% of upregulated  
45 genes), and elevated an stress response (24.9% of upregulated genes). Moreover,

1 expression of many genes associated with myoblast fusion (GO:0007520) was reduced  
2 among MuSCs in degenerative defects compared to those in regenerative defects at the  
3 same timepoint (Supp. Fig. 6b). We did not observe differences in MuSC numbers nor  
4 apoptosis at 14-dpi (Supp. Fig. 6c-d, n = 6 tissues from 6 mice, paired), however, there  
5 was a significant difference ( $p < 0.05$ ) in  $\beta 1$  integrin protein expression in degenerative  
6 defects by flow cytometry (Supp. Fig. 6e, n = 6 tissues from 6 mice, paired). Together,  
7 these results suggest the inflammatory milieu in degenerative defects induce variations  
8 in stress response, metabolism, and matrix attachment that may contribute to reductions  
9 in fusion and myogenic repair.

10

11 *Targeting predicted inter-cellular interactions alleviates muscle fibrosis by helping to*  
12 *resolve MuSC impairments*

13 To elucidate which inter-cellular communication networks drive the observed  
14 differential gene expression patterns among MuSCs and impairments in fusogenic  
15 behavior, we again employed NicheNet. We observed increases in interleukin 1 (IL-1)  
16 and TGF $\beta$ 1 among degenerative defects as potential drivers of the altered MuSC  
17 response (Figure 6a), influencing transcription of genes associated with attachment  
18 (*Vcam1*, *Itgb1*), stress response (*Fos*, *Fosb*, *Jun*, *C1qb*, *S100a8*, *S100a9*, *Hsp90aa1*),  
19 and ECM synthesis (*Col1a1*, *Col3a1*, *Fn1*) (Supp. Fig. 7a). *Il1b* was highly expressed  
20 among neutrophils and dendritic cells. *Tgfb1* was expressed in various cell types, though  
21 the most drastic upregulation across defect sizes was observed among macrophages and  
22 monocytes (Supp. Fig. 7b). TGF $\beta$ 1 has previously been shown to impair MuSC fusion<sup>55,56</sup>  
23 but not differentiation<sup>57</sup>, consistent with our in vitro observations following degenerative  
24 muscle defects (Figure 5). Moreover, TGF $\beta$ 1 is one of the most potent chemokines for  
25 neutrophils<sup>58</sup> and was predicted by NicheNet to be a top regulator of neutrophil  
26 populations in this system (Figure 2c). Thus, to evaluate the impact of TGF $\beta$  signaling on  
27 regeneration, we locally blocked the TGF $\beta$  signaling axis following degenerative VML  
28 injury with a TGF $\beta$  Receptor II inhibitor (ITD1) through intramuscular injection. At 28-dpi,  
29 there was a significant reduction in collagen deposition (Figure 6b-c, n = 5 tissues from 5  
30 mice, paired). Moreover, ITD1 treatment yielded increases in maximal tetanic force, with  
31 and without normalization to muscle cross sectional area, suggesting functional  
32 improvements (Figure 6e-f, Supp. Fig. 7c-g, n = 10 tissues from 10 mice, paired). Since  
33 TGF $\beta$ 1 is chemotactic for neutrophils and was among the ligands NicheNet predicted to  
34 influence neutrophils, we evaluated whether ITD1 treatment reduced neutrophil  
35 accumulation in degenerative defects using flow cytometry. In accordance with  
36 predictions, significantly fewer neutrophils were observed in ITD1 treated defects (Figure  
37 6d, n = 4 tissues from 2 mice, unpaired). Cumulatively, our results support a network  
38 driving VML-induced muscle degeneration whereby neutrophils infiltrate and persist in  
39 degenerative defects, and with elevated TGF $\beta$  signaling, impair fusion of MuSCs<sup>50,59</sup>  
40 (Figure 7).

41

42 **DISCUSSION**

1           Skeletal muscle displays a remarkable ability to regenerate following injuries  
2 through coordinative actions of MuSCs<sup>60</sup>. Yet, the dysregulated cellular and molecular  
3 mechanisms that develop after VML and prevent MuSC-based regeneration remain  
4 elusive, limiting therapeutic efficacy and restoration of function. Understanding drivers of  
5 this pathological behavior is critical to glean the effects of new therapeutic interventions  
6 targeting these circuits as well as improve existing therapeutic modalities. Herein, we use  
7 scRNA-Seq to characterize injuries that result in degeneration and fibrosis and show that  
8 degenerative VML displays exacerbated and prolonged inflammation that negatively  
9 influences the regenerative capacity of resident MuSCs. These datasets and results offer  
10 a rich resource to further improve our understanding of the VML etiology, as well as the  
11 restorative benefits of therapies.

12           Regeneration of skeletal muscle after injury is critically dependent on multiple  
13 types of immune cells that remove debris, condition the injury site with inflammation to  
14 prevent infection, and signal to resident stromal and stem cells to guide repair<sup>39</sup>. In  
15 accordance with other muscle-regenerative injury models<sup>39</sup>, neutrophil abundance in  
16 regenerative VML defects peaked after injury and returned to baseline before 7 days.  
17 However, in degenerative VML injuries, neutrophils persisted beyond one week post  
18 injury and were co-located with regenerating myofibers. Collateral skeletal muscle  
19 damage caused by neutrophil-derived oxidants, as well as the ability to attenuate such  
20 damage by blocking neutrophil activity, has been extensively studied in myopathies, age-  
21 associated muscle decline, as well as various models of muscle injury and fibrosis<sup>61</sup>. In  
22 line with these observations<sup>62,63</sup>, we observed sustained exposure to neutrophil  
23 secretomes in vitro resulted in decreases in fusion of MuSCs, and correlations between  
24 reduced neutrophil abundance, larger myofiber diameters, and improved functional  
25 recovery in vivo. As such, targeting neutrophils and impacting the timeline of neutrophil  
26 clearance after VML may enhance the efficacy of regenerative therapies and alter fibrotic  
27 versus regenerative outcomes.

28           A corollary of increased and sustained neutrophil infiltration in degenerative VML  
29 injury was increases in a compensatory population of NK cells. We did not observe NK  
30 cells at later time points (>14 days) after degenerative injury suggesting these cells are  
31 not targeting fibrotic cells, but rather play an immunoregulatory role by targeting neutrophil  
32 populations. The enhancements in apoptosis in vitro as well as the timing of NK cell  
33 infiltration, gene expression profile and co-localization with neutrophils suggest that NK  
34 cells function to attenuate the negative inflammation induced from VML by locally  
35 recruiting and inducing neutrophil apoptosis<sup>45,64</sup>. This is consistent with previous reports  
36 demonstrating an anti-inflammatory role of NK cells following auto-immune myocarditis<sup>65</sup>.  
37 While we cannot exclude that additional factors and other cell types may also interact with  
38 NK cells<sup>66</sup>, crosstalk between neutrophils and NK cells has also previously been observed  
39 in cancer and chronic infections<sup>67</sup>, but their interactions in muscle have not been  
40 elucidated. A seminal question is why does degenerative VML injury result in sustained  
41 inflammation and fibrosis despite the presence of NK cells that act to induce neutrophil  
42 apoptosis? A clue to the mechanism of this behavior was increased TGF $\beta$  signaling in  
43 degenerative defects, which inhibits NK cell cytotoxicity<sup>68</sup>. Further exploration of the  
44 capacity of NK cells to control neutrophil-based inflammation in the pathological  
45 microenvironment of VML injured muscle is warranted, as well as how this crosstalk  
46 contributes to behavior of T cells and macrophages.



1           The role of elevated TGF $\beta$  on muscle degeneration following VML most likely  
2 results from a complex network of macrophage and fibro-adipogenic progenitor (FAP)  
3 interactions<sup>69</sup>. Fibro-adipogenic progenitors (FAPs) are muscle resident cells that function  
4 as important regulators of extracellular matrix (ECM) deposition. In response to  
5 exacerbated or chronic inflammation, FAPs act as pathological drivers of muscle fibrosis,  
6 intramuscular fatty infiltration, and heterotopic ossification<sup>70</sup>. TGF $\beta$  signaling is a critical  
7 determinant of FAP activity and response<sup>71</sup>, and previous efforts to reduce TGF $\beta$  after  
8 VML have shown reductions in fibrosis<sup>71,72</sup>. Beyond reported influences on ECM secretion  
9 by mesenchymal cells and negative impacts on MuSC activation, differentiation<sup>3</sup>, and  
10 fusion<sup>56,57</sup>, TGF $\beta$  may also be contributing to persistent neutrophil infiltration<sup>58,73</sup>.  
11 Moreover, it is possible that TGF $\beta$  contributes to a feed-forward degenerative loop,  
12 whereby neutrophil secretion of IL1 $\beta$  increases macrophage secretion of TGF $\beta$ 1<sup>74</sup>, which  
13 then recruits more neutrophils<sup>58,73</sup>. This cascade has potent effects on mesenchymal  
14 stem cells and fibroblasts to synthesize collagen and TIMP1<sup>74</sup>, which in turn impairs  
15 MuSC regenerative capacity by manipulating activation, migration, and differentiation<sup>75,76</sup>.  
16 In line with this, we observed differential gene expression patterns between regenerative  
17 and degenerative MuSCs and alterations in attachment through  $\beta$ 1 integrin<sup>77</sup>. These  
18 results suggest aberrant cortical tension<sup>78</sup> from exacerbated ECM deposition and  
19 composition<sup>79,80</sup> may alter membrane remodeling and fusogenic behavior of MuSCs<sup>81,82</sup>.  
20 Consistent with this and other previous findings<sup>57</sup>, blockade of TGF $\beta$  signaling following  
21 degenerative VML injury reduced collagen deposition and helped recover muscle  
22 strength. Because the macrophage secretome, including TGF $\beta$ 1, is so critical to MuSC-  
23 mediated repair and sensitive to the local milieu<sup>83</sup>, additional exploration into how  
24 macrophage-MuSC crosstalk networks are dysregulated as a result of VML-induced  
25 microenvironmental changes is needed.

26           The cellular and molecular mechanisms driving pathological remodeling and  
27 degeneration following VML injuries remains under-examined. The approaches used in  
28 the present study begin to elucidate inter and intra-cellular signaling networks that are  
29 dysregulated as a result of critical injuries, contributing to muscle atrophy and fibrotic  
30 development. We envision these insights will provide a valuable resource for further  
31 exploration into mechanisms preventing healing after VML and therapeutics targeting  
32 those mechanisms.

33

## 34 **Acknowledgments**

35           The authors thank Jesus Castor-Macias, James Markworth, and Eric Buras for  
36 advice on histological and immunohistochemical analyses, Shannon Anderson and  
37 Young Jang for assistance with the VML injury model, and the University of Michigan  
38 DNA Sequencing Core for assistance with single cell sequencing library preparation. The  
39 authors also thank other members of the Aguilar laboratory.

40

## 41 **Funding**

42           Research reported in this publication was partially supported by the National  
43 Institute of Arthritis and Musculoskeletal and Skin Diseases of the National Institutes of  
44 Health under Award Number P30 AR069620 (C.A.A.), the 3M Foundation (C.A.A.),  
45 American Federation for Aging Research Grant for Junior Faculty (C.A.A.), the

1 Department of Defense and Congressionally Directed Medical Research Program  
2 W81XWH2010336 (C.A.A.), the University of Michigan Geriatrics Center and National  
3 Institute of Aging under award number P30 AG024824 (C.A.A.), the University of  
4 Michigan Rackham Graduate School, and the National Science Foundation Graduate  
5 Research Fellowship Program under Grant Number DGE 1256260 (J.A.L.). The content  
6 is solely the responsibility of the authors and does not necessarily represent the official  
7 views of the National Institutes of Health or National Science Foundation.

## 8 9 **Accession Code**

10 GSE: 163376

## 11 12 **Author contributions**

13 J.A.L., S.J.K., B.A.Y., C.D., P.M.F., M.H., S.V.B., and L.D.S. performed the experiments.  
14 J.A.L. analyzed the data. J.A.L., and C.A.A. designed the experiments. J.A.L. and C.A.A.  
15 wrote the manuscript with additions from other authors.

## 16 17 **Competing interests**

18 The authors declare no competing interests.

## 19 20 **References**

- 21 1. Grogan, B. F. & Hsu, J. R. Volumetric muscle loss. *J. Am. Acad. Orthop. Surg.*  
22 **19**, (2011).
- 23 2. Corona, B. T., Rivera, J. C., Owens, J. G., Wenke, J. C. & Rathbone, C. R.  
24 Volumetric muscle loss leads to permanent disability following extremity trauma.  
25 *J. Rehabil. Res. Dev.* **52**, 785–792 (2015).
- 26 3. Garg, K., Corona, B. T. & Walters, T. J. Therapeutic strategies for preventing  
27 skeletal muscle fibrosis after injury. *Frontiers in Pharmacology* vol. 6 (2015).
- 28 4. Garg, K. *et al.* Volumetric muscle loss: persistent functional deficits beyond frank  
29 loss of tissue. *J. Orthop. Res.* **33**, 40–6 (2015).
- 30 5. Owens, B. D., Kragh, J. F., Macaitis, J., Svoboda, S. J. & Wenke, J. C.  
31 Characterization of extremity wounds in operation Iraqi freedom and operation  
32 enduring freedom. in *Journal of Orthopaedic Trauma* vol. 21 254–257 (J Orthop  
33 Trauma, 2007).
- 34 6. Dziki, J. *et al.* An acellular biologic scaffold treatment for volumetric muscle loss:  
35 results of a 13-patient cohort study. *npj Regen. Med.* **1**, 1 (2016).
- 36 7. Sicari, B. M. *et al.* An acellular biologic scaffold promotes skeletal muscle  
37 formation in mice and humans with volumetric muscle loss. *Sci. Transl. Med.* **6**,  
38 234ra58 (2014).
- 39 8. Grasman, J. M., Zayas, M. J., Page, R. L. & Pins, G. D. Biomimetic scaffolds for  
40 regeneration of volumetric muscle loss in skeletal muscle injuries. *Acta*  
41 *Biomaterialia* vol. 25 2–15 (2015).
- 42 9. Shayan, M. & Huang, N. F. Pre-clinical cell therapeutic approaches for repair of  
43 volumetric muscle loss. *Bioengineering* vol. 7 1–14 (2020).

- 1 10. Corona, B. T., Rivera, J. C., Dalske, K. A., Wenke, J. C. & Greising, S. M.  
2 Pharmacological Mitigation of Fibrosis in a Porcine Model of Volumetric Muscle  
3 Loss Injury. *Tissue Eng. - Part A* **26**, 636–646 (2020).
- 4 11. Greising, S. M. *et al.* Early rehabilitation for volumetric muscle loss injury  
5 augments endogenous regenerative aspects of muscle strength and oxidative  
6 capacity. *BMC Musculoskelet. Disord.* **19**, 173 (2018).
- 7 12. Greising, S. M., Corona, B. T., McGann, C., Frankum, J. K. & Warren, G. L.  
8 Therapeutic Approaches for Volumetric Muscle Loss Injury: A Systematic Review  
9 and Meta-Analysis. *Tissue Engineering - Part B: Reviews* vol. 25 510–525 (2019).
- 10 13. Aguilar, C. A. *et al.* Multiscale analysis of a regenerative therapy for treatment of  
11 volumetric muscle loss injury. *Cell Death Discov.* **4**, (2018).
- 12 14. Das, S. *et al.* Pre-innervated tissue-engineered muscle promotes a pro-  
13 regenerative microenvironment following volumetric muscle loss. *Commun. Biol.*  
14 **3**, (2020).
- 15 15. Lieber, R. L. & Ward, S. R. Cellular mechanisms of tissue fibrosis. 4. structural  
16 and functional consequences of skeletal muscle fibrosis. *Am. J. Physiol. - Cell*  
17 *Physiol.* **305**, (2013).
- 18 16. Larouche, J., Greising, S. M., Corona, B. T. & Aguilar, C. A. Robust inflammatory  
19 and fibrotic signaling following volumetric muscle loss: A barrier to muscle  
20 regeneration comment. *Cell Death and Disease* vol. 9 1–3 (2018).
- 21 17. Yin, H., Price, F. & Rudnicki, M. A. Satellite cells and the muscle stem cell niche.  
22 *Physiol. Rev.* **93**, 23–67 (2013).
- 23 18. Howard, E. E., Pasiakos, S. M., Blesso, C. N., Fussell, M. A. & Rodriguez, N. R.  
24 Divergent Roles of Inflammation in Skeletal Muscle Recovery From Injury.  
25 *Frontiers in Physiology* vol. 11 87 (2020).
- 26 19. Wosczyzna, M. N. & Rando, T. A. A Muscle Stem Cell Support Group: Coordinated  
27 Cellular Responses in Muscle Regeneration. *Dev. Cell* **46**, 135–143 (2018).
- 28 20. Burzyn, D. *et al.* A Special Population of regulatory T Cells Potentiates muscle  
29 repair. *Cell* **155**, 1282–1295 (2013).
- 30 21. Panduro, M., Benoist, C. & Mathis, D. Treg cells limit IFN- $\gamma$  production to control  
31 macrophage accrual and phenotype during skeletal muscle regeneration. *Proc.*  
32 *Natl. Acad. Sci. U. S. A.* **115**, E2585–E2593 (2018).
- 33 22. Arnold, L. *et al.* Inflammatory monocytes recruited after skeletal muscle injury  
34 switch into antiinflammatory macrophages to support myogenesis. *J. Exp. Med.*  
35 **204**, 1057–1069 (2007).
- 36 23. Dort, J., Fabre, P., Molina, T. & Dumont, N. A. Macrophages Are Key Regulators  
37 of Stem Cells during Skeletal Muscle Regeneration and Diseases. *Stem Cells Int.*  
38 **2019**, (2019).
- 39 24. Sommerfeld, S. D. *et al.* Interleukin-36 $\gamma$ -producing macrophages drive IL-17-  
40 mediated fibrosis. *Sci. Immunol.* **4**, (2019).
- 41 25. Novak, M. L., Weinheimer-Haus, E. M. & Koh, T. J. Macrophage activation and  
42 skeletal muscle healing following traumatic injury. *J. Pathol.* **232**, 344–355 (2014).
- 43 26. Hurtgen, B. *et al.* Severe muscle trauma triggers heightened and prolonged local  
44 musculoskeletal inflammation and impairs adjacent tibia fracture healing. *J*  
45 *Musculoskelet Neuronal Interact* **16**, 122–134 (2016).
- 46 27. Sadtler, K. *et al.* Developing a pro-regenerative biomaterial scaffold

- 1 microenvironment requires T helper 2 cells. *Science* (80-. ). **352**, 366–370 (2016).
- 2 28. Deyhle, M. R. & Hyldahl, R. D. The role of T lymphocytes in skeletal muscle repair
- 3 from traumatic and contraction-induced injury. *Frontiers in Physiology* vol. 9
- 4 (2018).
- 5 29. Anderson, S. E. *et al.* Determination of a critical size threshold for volumetric
- 6 muscle loss in the mouse quadriceps. *Tissue Eng. - Part C Methods* **25**, 59–70
- 7 (2019).
- 8 30. Stuart, T. *et al.* Comprehensive Integration of Single-Cell Data. *Cell* **177**, 1888-
- 9 1902.e21 (2019).
- 10 31. Becht, E. *et al.* Dimensionality reduction for visualizing single-cell data using
- 11 UMAP. *Nat. Biotechnol.* **37**, 38–47 (2019).
- 12 32. Shao, X. *et al.* scCATCH: Automatic Annotation on Cell Types of Clusters from
- 13 Single-Cell RNA Sequencing Data. *iScience* **23**, (2020).
- 14 33. Schaum, N. *et al.* Single-cell transcriptomics of 20 mouse organs creates a
- 15 Tabula Muris. *Nature* **562**, 367–372 (2018).
- 16 34. Almanzar, N. *et al.* A single-cell transcriptomic atlas characterizes ageing tissues
- 17 in the mouse. *Nature* **583**, 590–595 (2020).
- 18 35. Giordani, L. *et al.* High-Dimensional Single-Cell Cartography Reveals Novel
- 19 Skeletal Muscle-Resident Cell Populations. *Mol. Cell* **74**, 609-621.e6 (2019).
- 20 36. Finak, G. *et al.* MAST: A flexible statistical framework for assessing transcriptional
- 21 changes and characterizing heterogeneity in single-cell RNA sequencing data.
- 22 *Genome Biol.* **16**, 278 (2015).
- 23 37. Dulken, B. W. *et al.* Single-cell analysis reveals T cell infiltration in old neurogenic
- 24 niches. *Nature* **571**, 205–210 (2019).
- 25 38. Thomas, P. D. *et al.* PANTHER: A library of protein families and subfamilies
- 26 indexed by function. *Genome Res.* **13**, 2129–2141 (2003).
- 27 39. Tidball, J. G. Regulation of muscle growth and regeneration by the immune
- 28 system. *Nature Reviews Immunology* vol. 17 165–178 (2017).
- 29 40. Browaeys, R., Saelens, W. & Saeys, Y. NicheNet: modeling intercellular
- 30 communication by linking ligands to target genes. *Nat. Methods* **17**, 159–162
- 31 (2020).
- 32 41. Terabe, M. & Berzofsky, J. A. Tissue-specific roles of NKT cells in tumor
- 33 immunity. *Frontiers in Immunology* vol. 9 (2018).
- 34 42. Capote, J. *et al.* Osteopontin ablation ameliorates muscular dystrophy by shifting
- 35 macrophages to a proregenerative phenotype. *J. Cell Biol.* **213**, 275–288 (2016).
- 36 43. Vetrone, S. A. *et al.* Osteopontin promotes fibrosis in dystrophic mouse muscle by
- 37 modulating immune cell subsets and intramuscular TGF-beta. *J. Clin. Invest.* **119**,
- 38 1583–94 (2009).
- 39 44. Bezman, N. A. *et al.* Molecular definition of the identity and activation of natural
- 40 killer cells. *Nat. Immunol.* **13**, 1000–1008 (2012).
- 41 45. Thorén, F. B. *et al.* Human NK Cells Induce Neutrophil Apoptosis via an NKp46-
- 42 and Fas-Dependent Mechanism. *J. Immunol.* **188**, 1668–1674 (2012).
- 43 46. Francis, K. & Palsson, B. O. Effective intercellular communication distances are
- 44 determined by the relative time constants for cyto/chemokine secretion and
- 45 diffusion. *Proc. Natl. Acad. Sci. U. S. A.* **94**, 12258–12262 (1997).
- 46 47. Oyler-Yaniv, A. *et al.* A Tunable Diffusion-Consumption Mechanism of Cytokine

- 1 Propagation Enables Plasticity in Cell-to-Cell Communication in the Immune
- 2 System. *Immunity* **46**, 609–620 (2017).
- 3 48. Wang, J. Neutrophils in tissue injury and repair. *Cell and Tissue Research* vol.
- 4 371 531–539 (2018).
- 5 49. Simionescu-Bankston, A. *et al.* Creatine kinase B is necessary to limit myoblast
- 6 fusion during myogenesis. *Am. J. Physiol. - Cell Physiol.* **308**, C919–C931 (2015).
- 7 50. Marchildon, F., Lamarche, É., Lala-Tabbert, N., St-Louis, C. & Wiper-Bergeron, N.
- 8 Expression of CCAAT/enhancer binding protein beta in muscle satellite cells
- 9 inhibits myogenesis in cancer cachexia. *PLoS One* **10**, (2015).
- 10 51. AlSudais, H., Lala-Tabbert, N. & Wiper-Bergeron, N. CCAAT/Enhancer Binding
- 11 Protein  $\beta$  inhibits myogenic differentiation via ID3. *Sci. Rep.* **8**, 16613 (2018).
- 12 52. Summermatter, S. *et al.* Blockade of Metallothioneins 1 and 2 Increases Skeletal
- 13 Muscle Mass and Strength. *Mol. Cell. Biol.* **37**, (2017).
- 14 53. Jørgensen, L. H. *et al.* Secreted protein acidic and rich in cysteine (SPARC) in
- 15 human skeletal muscle. *J. Histochem. Cytochem.* **57**, 29–39 (2009).
- 16 54. Reimann, J. *et al.* Macrophage Migration Inhibitory Factor in Normal Human
- 17 Skeletal Muscle and Inflammatory Myopathies. *J. Neuropathol. Exp. Neurol.* **69**,
- 18 654–662 (2010).
- 19 55. Petrany, M. J. & Millay, D. P. Cell Fusion: Merging Membranes and Making
- 20 Muscle. *Trends in Cell Biology* vol. 29 964–973 (2019).
- 21 56. Melendez, J. *et al.* TGF $\beta$  signalling acts as a molecular brake of myoblast fusion.
- 22 *Nat. Commun.* 2021 121 **12**, 1–11 (2021).
- 23 57. Girardi, F. *et al.* TGF $\beta$  signaling curbs cell fusion and muscle regeneration. *Nat.*
- 24 *Commun.* 2021 121 **12**, 1–16 (2021).
- 25 58. Brandes, M. E., Mai, U. E., Ohura, K. & Wahl, S. M. Type I transforming growth
- 26 factor-beta receptors on neutrophils mediate chemotaxis to transforming growth
- 27 factor-beta. *J. Immunol.* **147**, (1991).
- 28 59. Cohen, T. V. *et al.* Upregulated IL-1 $\beta$  in dysferlin-deficient muscle attenuates
- 29 regeneration by blunting the response to pro-inflammatory macrophages. *Skelet.*
- 30 *Muscle* **5**, (2015).
- 31 60. Aguilar, C. A. *et al.* Transcriptional and Chromatin Dynamics of Muscle
- 32 Regeneration after Severe Trauma. *Stem Cell Reports* **7**, 983–997 (2016).
- 33 61. Ziemkiewicz, N., Hilliard, G., Pullen, N. A. & Garg, K. The role of innate and
- 34 adaptive immune cells in skeletal muscle regeneration. *International Journal of*
- 35 *Molecular Sciences* vol. 22 (2021).
- 36 62. Pizza, F. X., Peterson, J. M., Baas, J. H. & Koh, T. J. Neutrophils contribute to
- 37 muscle injury and impair its resolution after lengthening contractions in mice. *J.*
- 38 *Physiol.* **562**, 899–913 (2005).
- 39 63. Walden, D. L. *et al.* Neutrophils accumulate and contribute to skeletal muscle
- 40 dysfunction after ischemia-reperfusion. *Am. J. Physiol. - Hear. Circ. Physiol.* **259**,
- 41 (1990).
- 42 64. Bylund, J. *et al.* Mechanism Apoptosis via an NKp46-and Fas-Dependent Human
- 43 NK Cells Induce Neutrophil. (2020) doi:10.4049/jimmunol.1102002.
- 44 65. Ong, S. *et al.* Natural killer cells limit cardiac inflammation and fibrosis by halting
- 45 eosinophil infiltration. *Am. J. Pathol.* **185**, 847–861 (2015).
- 46 66. Ruscetti, M. *et al.* NK cell-mediated cytotoxicity contributes to tumor control by a

- 1       cytostatic drug combination. *Science (80-. )*. **362**, 1416–1422 (2018).
- 2   67. Costantini, C. & Cassatella, M. A. The defensive alliance between neutrophils and
- 3       NK cells as a novel arm of innate immunity. *J. Leukoc. Biol.* **89**, 221–233 (2011).
- 4   68. Ghiringhelli, F. *et al.* CD4+CD25+ regulatory T cells inhibit natural killer cell
- 5       functions in a transforming growth factor- $\beta$ -dependent manner. *J. Exp. Med.* **202**,
- 6       1075–1085 (2005).
- 7   69. Stepien, D. M. *et al.* Tuning Macrophage Phenotype to Mitigate Skeletal Muscle
- 8       Fibrosis. *J. Immunol.* **204**, 2203 LP – 2215 (2020).
- 9   70. Theret, M., Rossi, F. M. V. & Contreras, O. Evolving Roles of Muscle-Resident
- 10       Fibro-Adipogenic Progenitors in Health, Regeneration, Neuromuscular Disorders,
- 11       and Aging. *Front. Physiol.* **12**, (2021).
- 12   71. Mázala, D. A. G. *et al.* TGF- $\beta$ -driven muscle degeneration and failed regeneration
- 13       underlie disease onset in a DMD mouse model. *JCI Insight* **5**, (2020).
- 14   72. Garg, K. & Boppart, M. D. Influence of exercise and aging on extracellular matrix
- 15       composition in the skeletal muscle stem cell niche. *J. Appl. Physiol.* **121**, 1053–
- 16       1058 (2016).
- 17   73. Reibman, J. *et al.* Transforming growth factor  $\beta$ 1, a potent chemoattractant for
- 18       human neutrophils, bypasses classic signal-transduction pathways. *Proc. Natl.*
- 19       *Acad. Sci. U. S. A.* **88**, 6805–6809 (1991).
- 20   74. Vidal, B. *et al.* Fibrinogen drives dystrophic muscle fibrosis via a TGF $\beta$ /alternative
- 21       macrophage activation pathway. *Genes Dev.* **22**, 1747–1752 (2008).
- 22   75. Yamada, M. *et al.* Matrix metalloproteinases are involved in mechanical stretch-
- 23       induced activation of skeletal muscle satellite cells. *Muscle and Nerve* **34**, 313–
- 24       319 (2006).
- 25   76. Xiaoping, C. & Yong, L. Role of matrix metalloproteinases in skeletal muscle:
- 26       Migration, differentiation, regeneration and fibrosis. *Cell Adhesion and Migration*
- 27       vol. 3 337 (2009).
- 28   77. Rozo, M., Li, L. & Fan, C. M. Targeting  $\beta$ 1-integrin signaling enhances
- 29       regeneration in aged and dystrophic muscle in mice. *Nat. Med.* **22**, 889–896
- 30       (2016).
- 31   78. Kim, J. H. *et al.* Mechanical Tension Drives Cell Membrane Fusion Article
- 32       Mechanical Tension Drives Cell Membrane Fusion. *Dev. Cell* **32**, 561–573 (2015).
- 33   79. Bentzinger, C. F. *et al.* Fibronectin regulates Wnt7a signaling and satellite cell
- 34       expansion. *Cell Stem Cell* **12**, 75–87 (2013).
- 35   80. Lukjanenko, L. *et al.* Loss of fibronectin from the aged stem cell niche affects the
- 36       regenerative capacity of skeletal muscle in mice. *Nat. Med.* **22**, 897–905 (2016).
- 37   81. Gilbert, P. M. *et al.* Substrate elasticity regulates skeletal muscle stem cell self-
- 38       renewal in culture. *Science (80-. )*. **329**, 1078–1081 (2010).
- 39   82. Tierney, M. T. *et al.* Autonomous Extracellular Matrix Remodeling Controls a
- 40       Progressive Adaptation in Muscle Stem Cell Regenerative Capacity during
- 41       Development. *Cell Rep.* **14**, 1940–1952 (2016).
- 42   83. Markworth, J. F. *et al.* Resolvin D1 supports skeletal myofiber regeneration via
- 43       actions on myeloid and muscle stem cells. *JCI Insight* **5**, (2020).
- 44

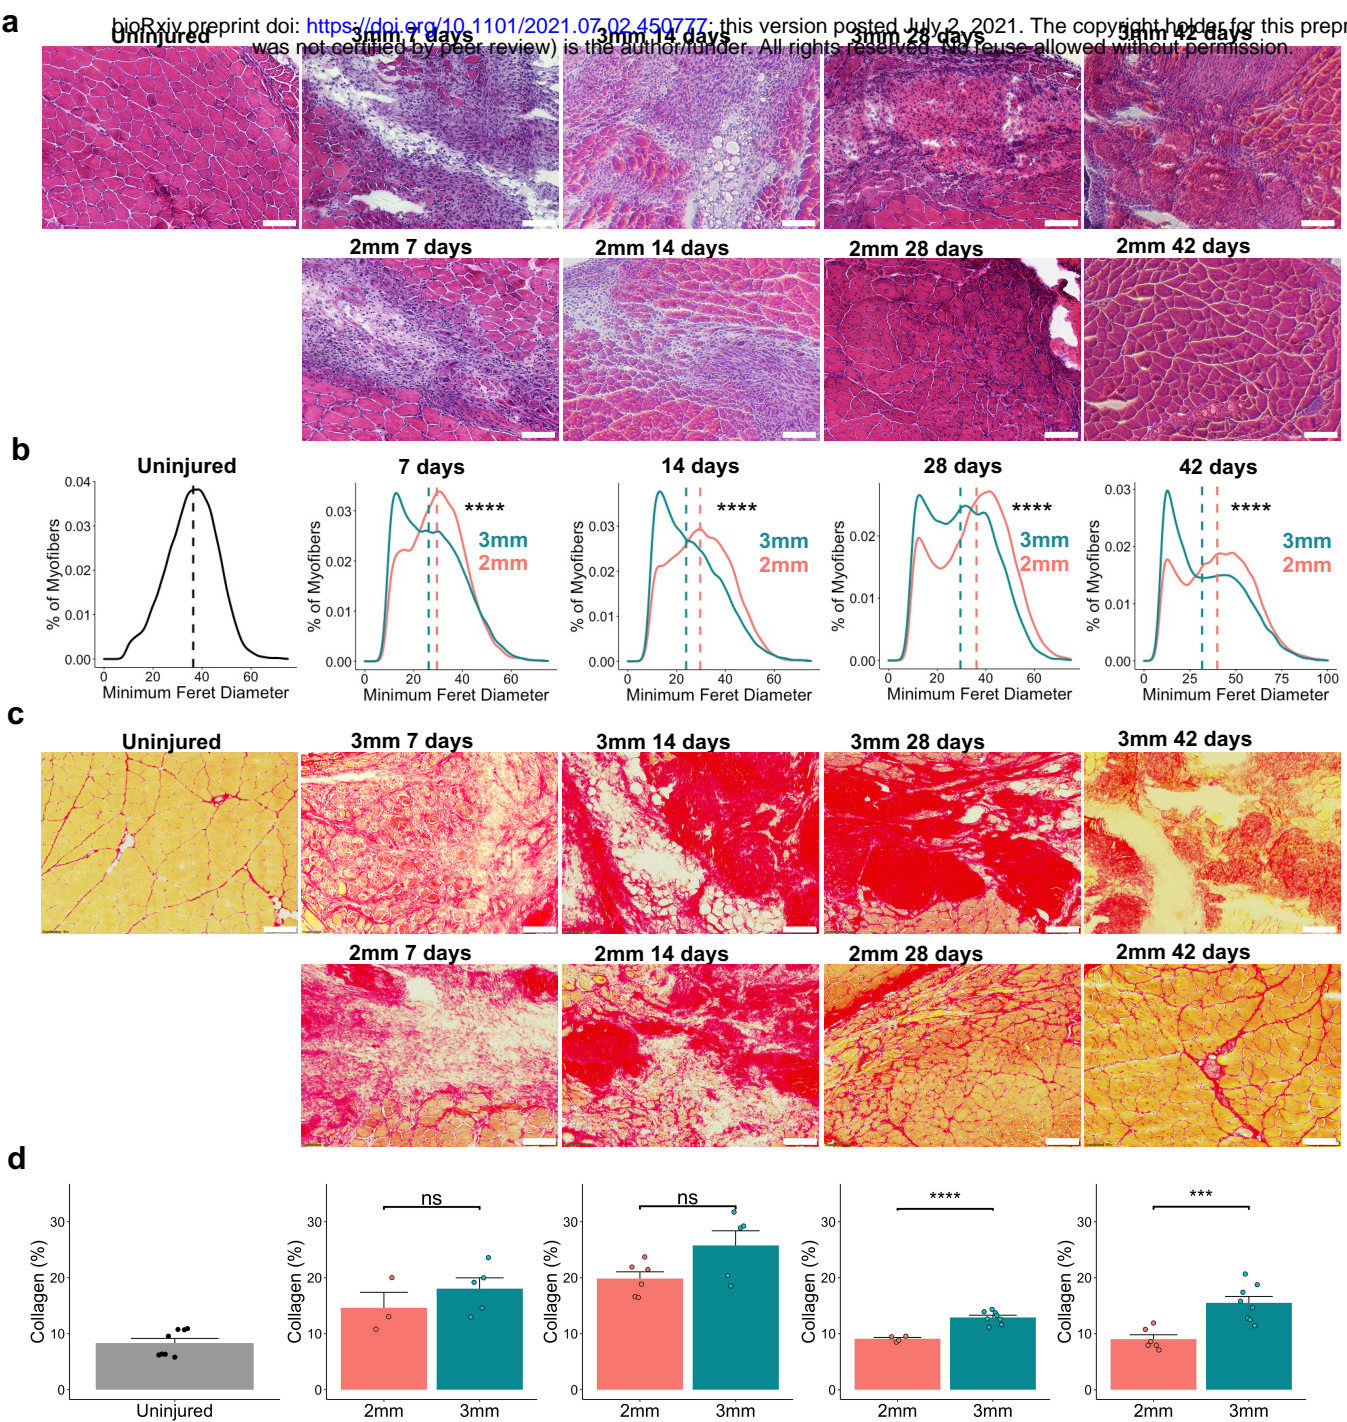

**Figure 1. Degenerative VML defects exhibit increased fibrosis and reduced myofiber diameters.** (a) Representative hematoxylin and eosin stains of uninjured quadriceps along with 2mm and 3mm defects harvested 7-, 14-, 28-, and 42-days post injury. Scale bars indicate 200 microns. Quantifications (part b) were performed on full section stitched images. Single windows of the defect area are shown for detail. (b) Portion of myofibers stratified by minimum Feret diameter shows smaller fiber size distribution following 3mm defect. \*\*\*\* $p < 0.0001$  by two-sample, two-sided Kolmogorov-Smirnov test for equal distributions.  $D = 0.12, 0.16, 0.16,$  and  $0.15$  for 7-, 14-, 28-, and 42-dpi, respectively. Feret Diameters were calculated for 5-7 full-section images each from a distinct defect, per group, and pooled for comparison of distributions. Dashed lines indicate mean minimum Feret diameters. (c) Representative Picro Sirius Red stains of 2mm and 3mm defects throughout the time course. (d) Quantification of total collagen content showing a return to pre-injury levels following 2mm defects by 28-dpi but a significant increase and persistence following 3mm defects. Scale bars indicate 200 microns. Bars show mean  $\pm$  SEM. ns denotes not significant ( $p > 0.05$ ). \*\*\*\* $p < 0.0001$ , \*\*\* $p < 0.001$  by two-sided t-test.  $n = 3-7$  tissues per group. Cohen's  $d = 0.7566, 1.2678, 2.2536,$  and  $2.4264,$  and power =  $0.1394, 0.4452, 0.9961,$  and  $0.9894$  for 7-, 14-, 28-, and 42-dpi, respectively. Quantifications were performed on full section stitched images (representatives shown in Supp. Fig. 1). Single windows of the defect area are shown for detail.

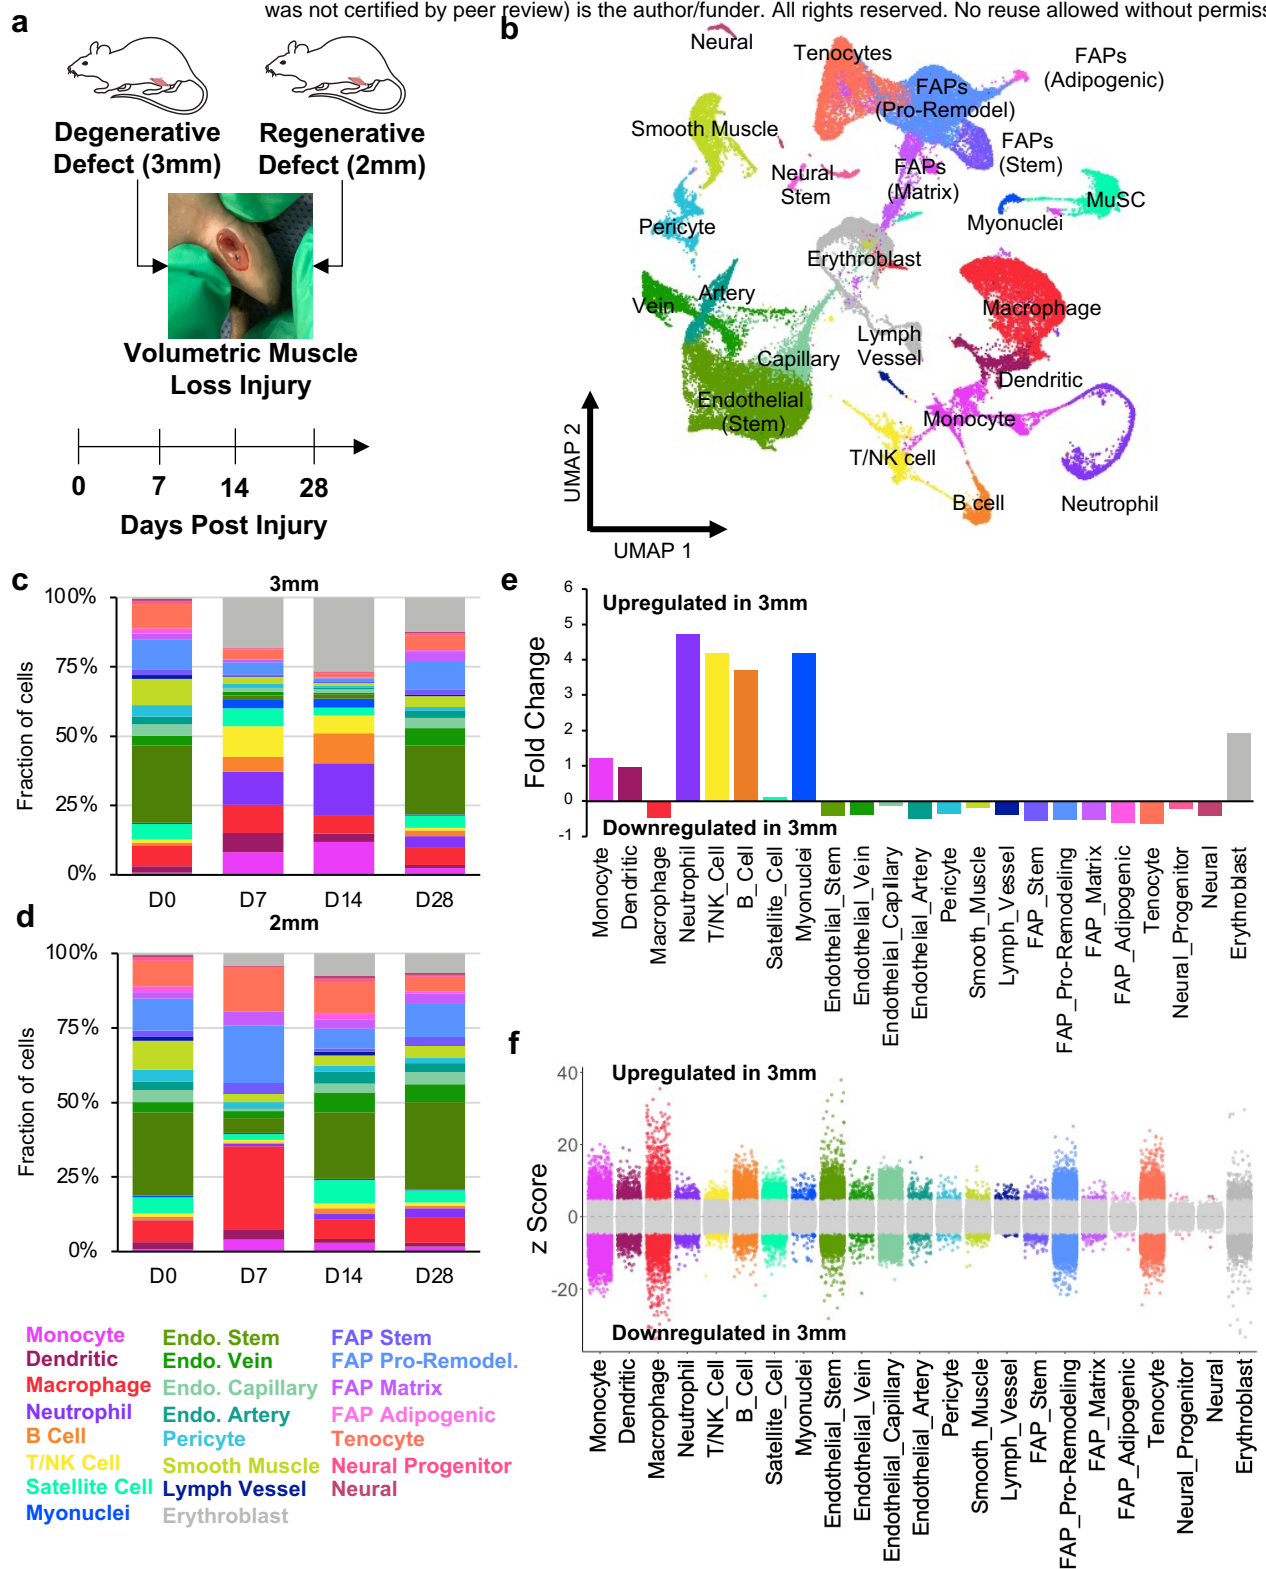

**Figure 2. Single-Cell RNA sequencing of regenerative and degenerative muscle defects show exacerbated and persistent inflammation in injuries that do not heal.** (a) Schematic of experiment, whereby adult (10-12 weeks) mice were administered 2mm or 3mm biopsy punches to their rectus femoris and humanely euthanized before injury, or 7-, 14-, or 28-dpi for scRNA-Seq analysis. (b) Dimensional reduction and unsupervised clustering of mono-nucleated cells isolated from uninjured quadriceps as well as injured quadriceps at 7-, 14-, and 28-dpi showing 23 different recovered cell types according to marker gene overlays and scCATCH cluster annotation. Two mice were pooled and sequenced for each defect size at each time-point, and between 2337 and 7500 high-quality libraries were generated for each condition. Quantification of cell abundances at each time-point sequenced following (c) 3mm and (d) 2mm VML defects shows increased and persistent inflammation among 3mm defects. (e) Fold changes in cell abundance following 3mm defects in comparison to 2mm defects merged across all timepoints shows nearly 5-fold increase in neutrophils, B cells, and T and NK cells. (f) Differential gene expression among each cell-type merged across time points and normalized to 2mm defects. Grey region indicates adjusted p-value less than 0.05. z-scores and p-values were calculated for each gene using MAST.



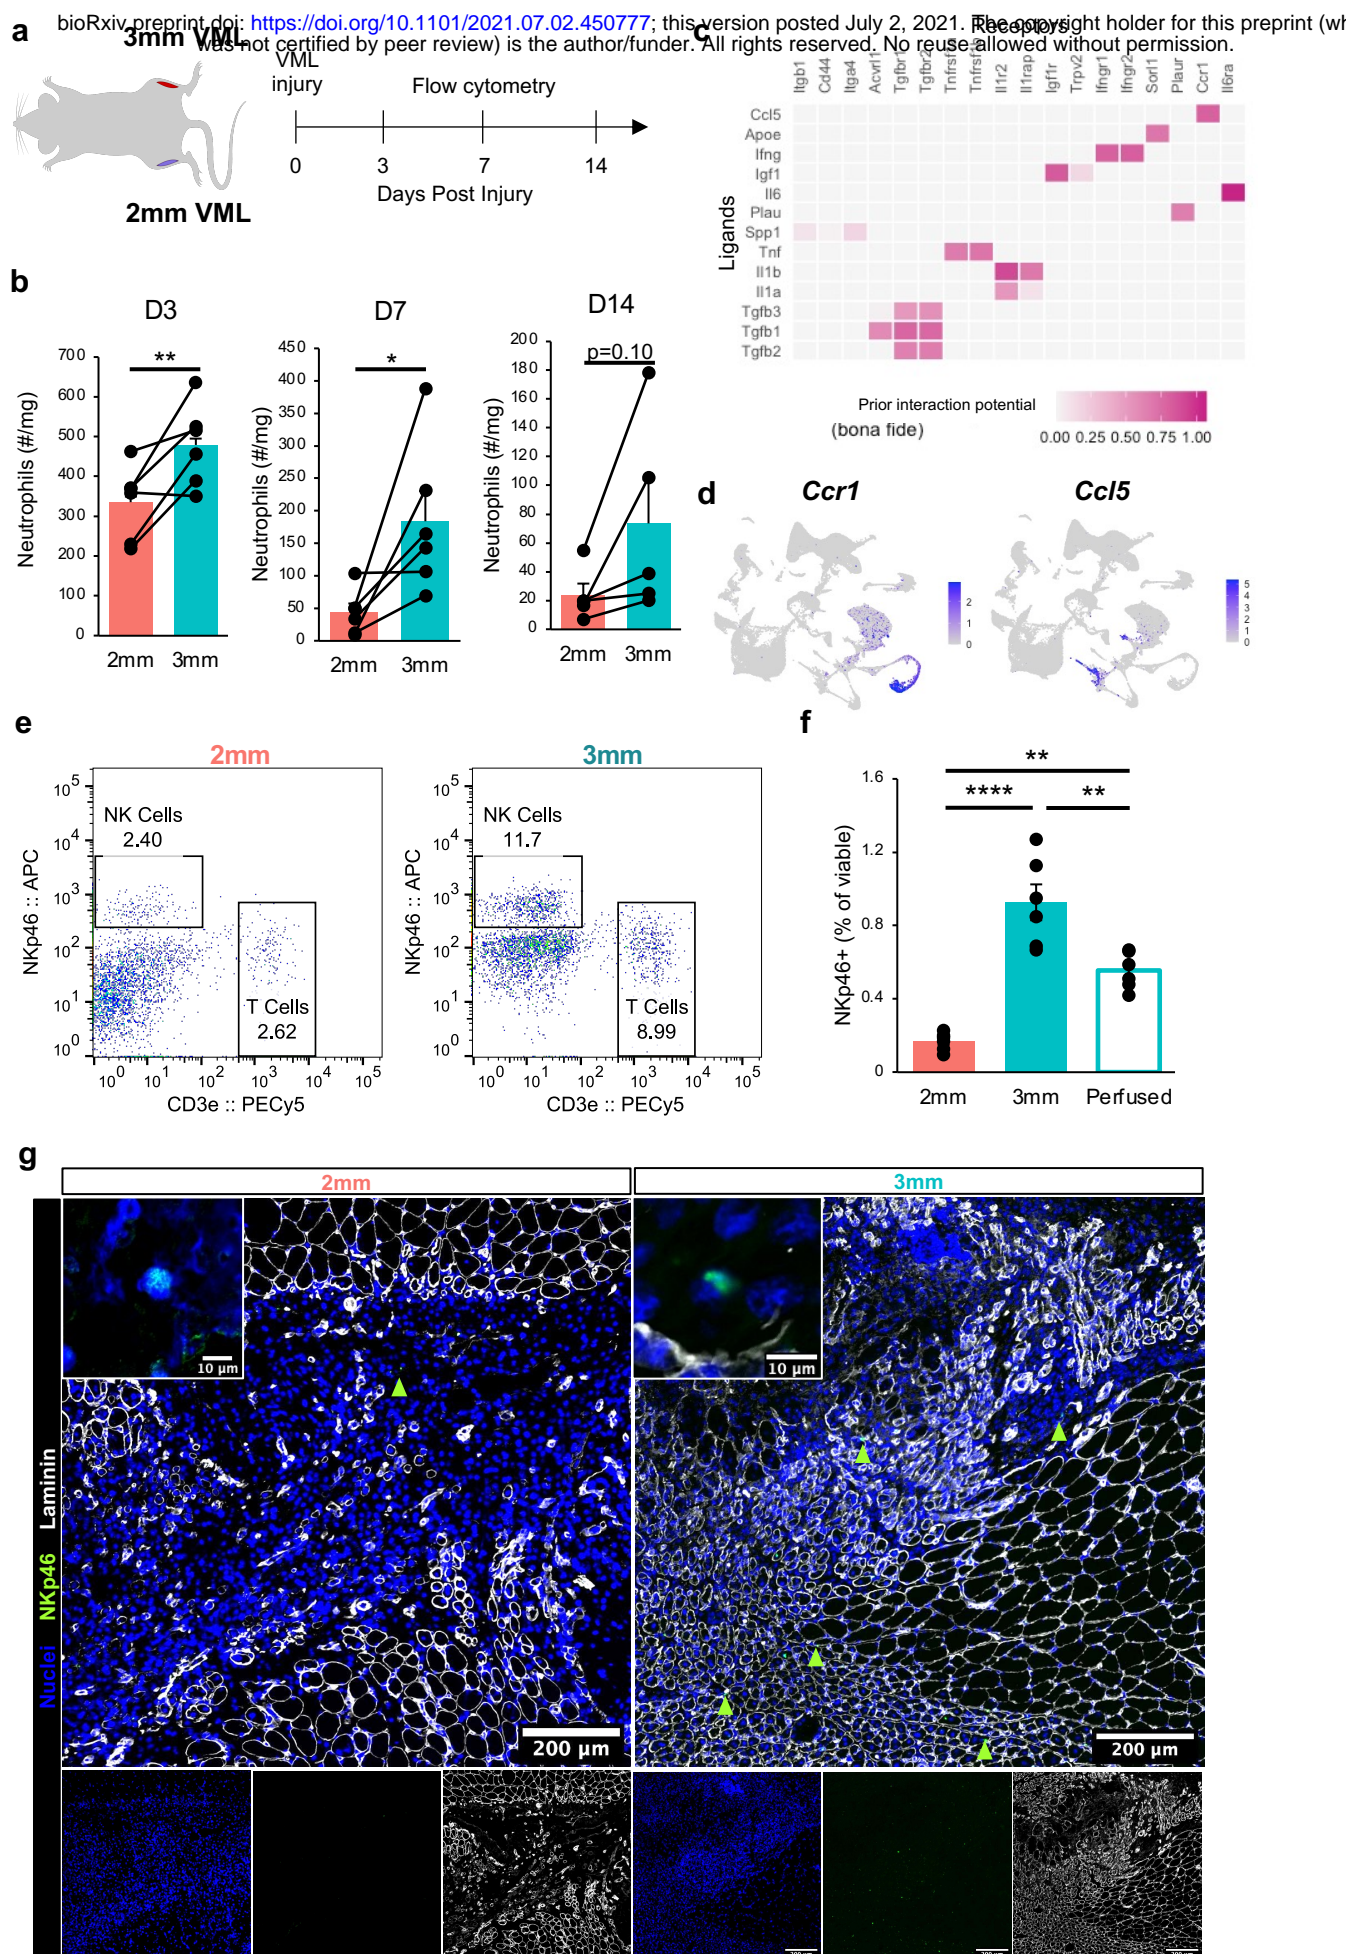

**Figure 3. Perturbations in inflammatory cell signaling after degenerative muscle injury.** (b) Fine-tuned neutrophil infiltration in 2mm and 3mm defects quantified by flow cytometry. Mice received one 3mm and one 2mm VML defect. Boxplots show mean  $\pm$  SEM. n=5-6 mice per time point. \*p<0.05, \*\*p<0.01 by two-sided, paired t-test. Cohen's d = 2.1, 1.17, and 0.94 for 3-, 7-, and 14-dpi, respectively. (c) Top-ranked NicheNet ligand-receptor pairs based on prior literature and their prediction of downstream target gene expression. CCL5 and IFN $\gamma$  are two of the top ligands predicted to influence neutrophils following 3mm defects. (d) UMAP overlays of *Ccr1* and *Ccl5* expression showing neutrophils having highest *Ccr1* mRNA expression and T/NK cells having the highest *Ccl5* mRNA expression. (e) Representative flow cytometry scatter plots showing T cell and NK cell abundance in 2mm vs 3mm VML defects at 7-dpi. (f) Flow cytometry quantification of NK cell abundance in 2mm and 3mm defects 7-dpi as well as in 3mm defects 7-dpi following whole-body saline perfusion prior to dissection. Graph shows mean  $\pm$  SEM. \*\*p < 0.001, \*\*\*\*p<0.0001 by one-way ANOVA and Bonferroni post-hoc analysis. n = 6 injuries per group. Effect size = 2.21. (g) Immunohistology stains qualitatively show NK cell localization primarily within the defects, and increased numbers in 3mm defects. Scale bar indicates 200um. Scale bar on inset indicates 10um.

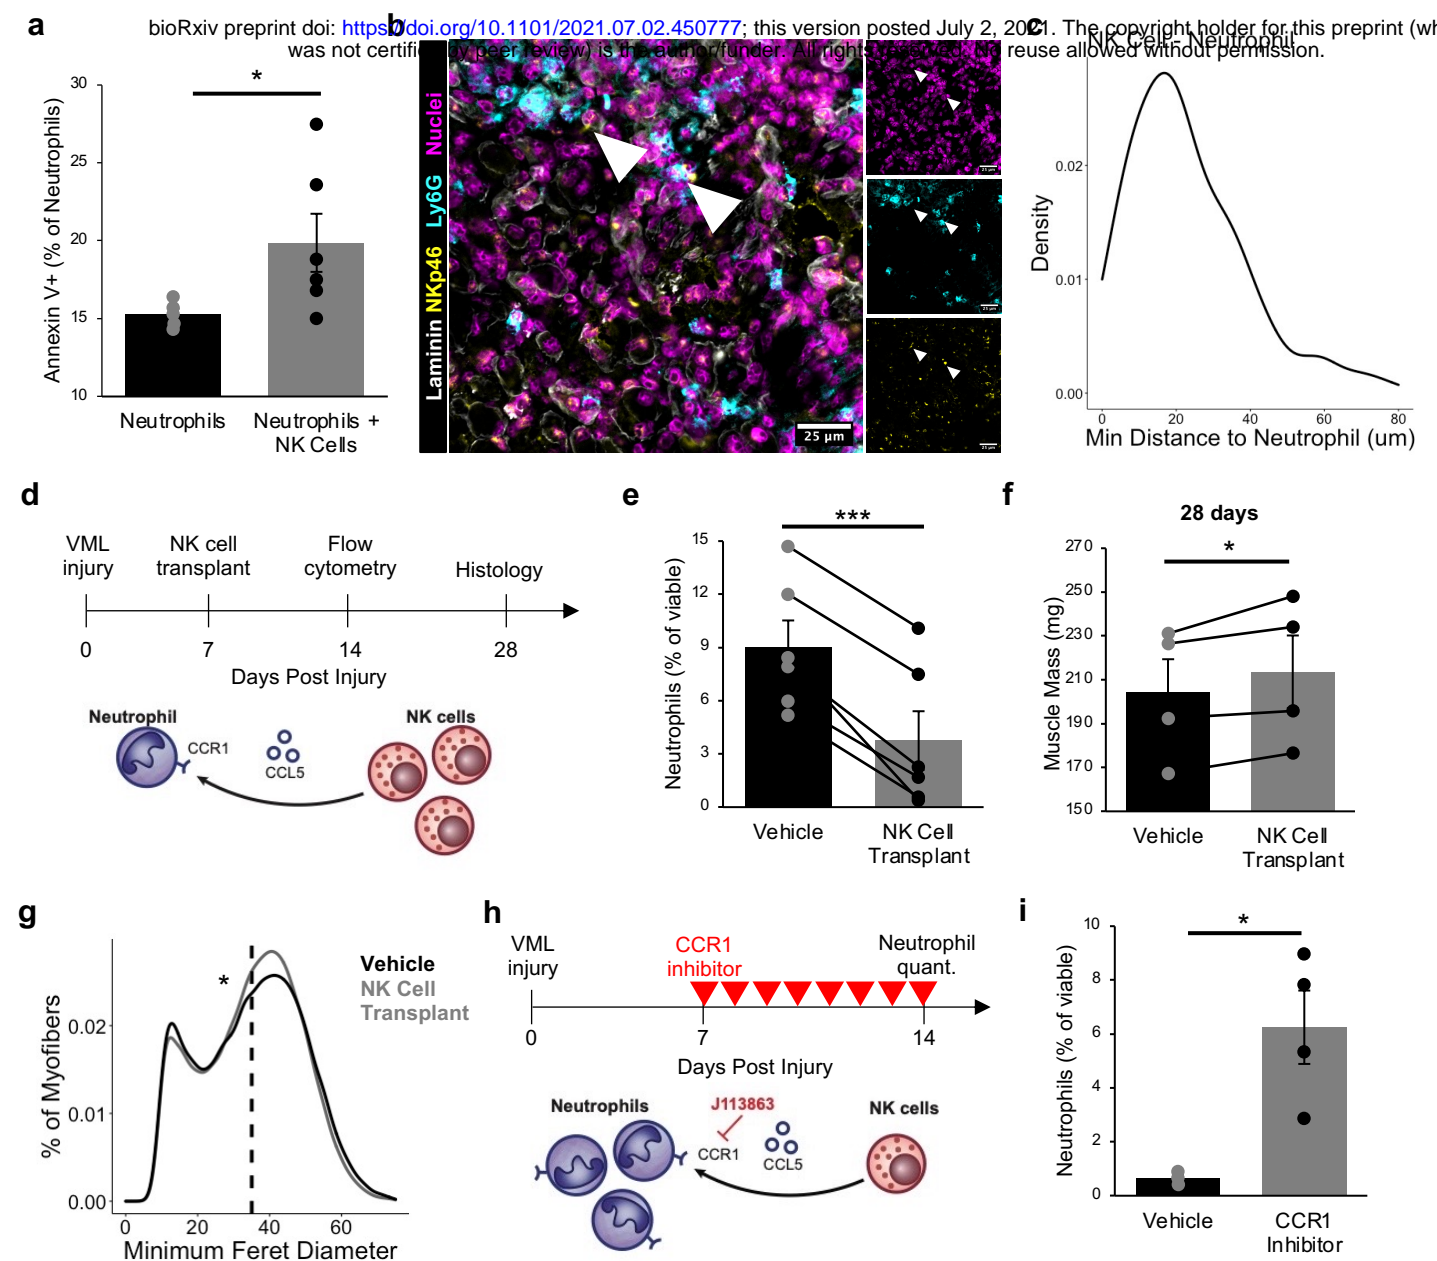

**Figure 4. Natural killer cells interact with neutrophils in VML injuries.** (a) NK cells induce neutrophil apoptosis in co-culture based on increased Annexin V+ cells, as analyzed by flow cytometry. \* $p < 0.05$ .  $n = 5-6$  wells. Each well contains a pool of neutrophils FACS-enriched from four 3mm VML defects 7-dpi. NK cells were MACS-enriched from one spleen and activated in vitro for 48 hours. (b) Immunohistochemical stains for DAPI, NKp46, Ly6G, and laminin in VML defects 7-dpi show co-localization of neutrophils and NK cells. Scale bar indicates 25 microns. (c) Distributions of minimum Euclidean distances between NK cells. 92.5% of NK cells are within 50 $\mu$ m of the nearest neutrophil.  $n = 159$  NK cells and 397 neutrophils from 9 60X images of 4 defects. (d) Schematic whereby 150,000 in-vitro activated NK cells were transplanted into 2mm defects at 7-dpi. Contralateral control limbs received PBS injections. Neutrophil quantification and tissue morphology were assessed at 14- and 28-dpi, respectively. (e) NK cell transplant significantly reduced neutrophil abundance, quantified by flow cytometry for CD45+CD11b+Ly6G+ cells. \*\*\* $p < 0.001$  by two-sided, paired t-test. Cohen's  $d = 2.23$ .  $n = 6$  muscles ( $N = 6$  mice). Graph shows mean + standard error. (f) Quadriceps receiving an NK cell transplant had a significantly larger muscle mass, suggesting a positive impact of NK cells on regeneration.  $n = 4$  muscles. \* $p < 0.05$  by two-sided, paired t-test. Cohen's  $d = 1.64$ . Graphs show mean + SEM. (g) Portion of myofibers stratified by minimum Feret diameter shows NK cell transplant reduced proportions of fibers with small minimum Feret diameters (less than 25 $\mu$ m), which aligns with enhanced regeneration. \* $p < 0.0001$  by two-sample, two-sided Kolmogorov-Smirnov test for equal distributions. Dashed lines indicate mean minimum Feret diameters, which was approximately equal due to shift in the peak of larger fibers.  $n = 4$  muscles. (h) Schematic of experiment design whereby a cohort of mice received 3mm defects followed by daily intraperitoneal injection of CCR1 inhibitor (J113863) between days 7 and 14 post injury. Neutrophil populations were quantified by flow cytometry (CD45+CD11b+Ly6g+) at 14-dpi. CCR1 is a receptor for CCL5 expressed on neutrophils. (i) CCR1 inhibition significantly increased neutrophil abundance in 3mm defects, to a similar extent as the NK cell transplant reduced neutrophil populations, suggesting that NK cells may locally recruit neutrophils via CCL5 secretion in order to induce contact-dependent apoptosis. \* $p < 0.05$  by two-sided, two-sample t-test assuming equal variance.  $n = 3-4$  mice per group, repeated twice. Cohen's  $d = 2.64$ . Graph shows mean + SEM.

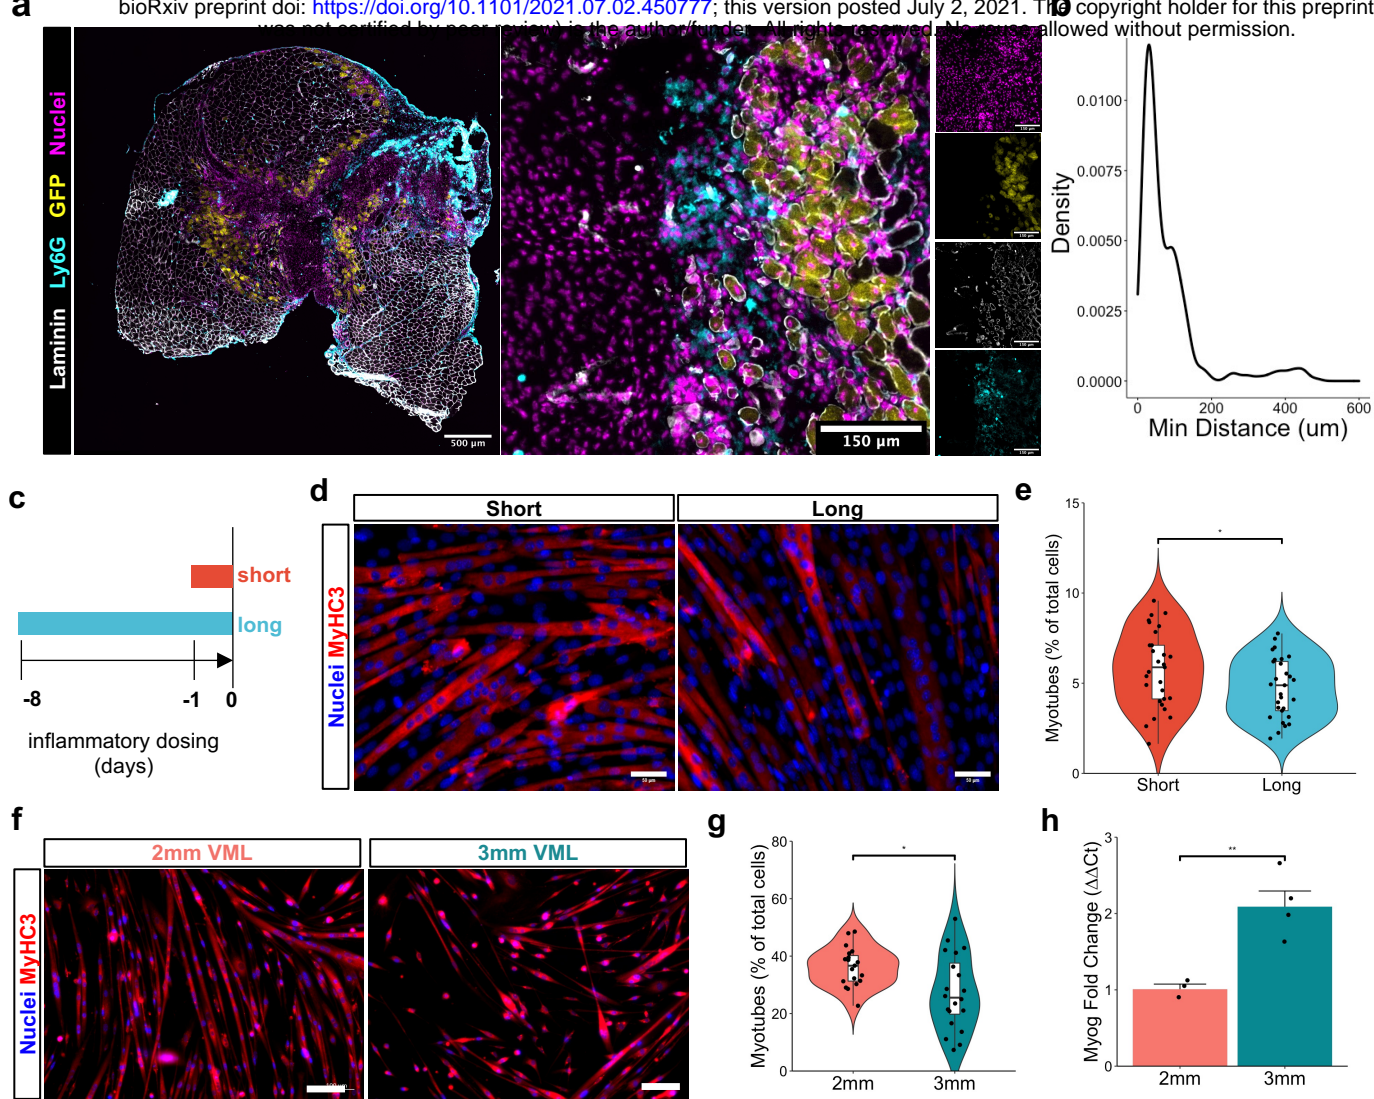

**Figure 5. Neutrophil secretome impairs myoblast fusion in accordance with reduced muscle stem cell regenerative capacity following critical sized defects.** (a) Representative image showing interspersed neutrophils (cyan) within GFP+ regenerating myofibers (yellow) at 14-dpi. (b) Distributions of minimum Euclidean distances between neutrophils and GFP+ regenerating fibers. Over 93% of neutrophils cells are within 250 $\mu\text{m}$  of the nearest regenerating fiber.  $n = 382$  neutrophils and 410 GFP+ fibers from 20X images of 4 defects at 14-dpi. (c) Schematic of experiment design, whereby C2C12s are cultured in neutrophil conditioned myoblast media for 8 (long) or 1 (short) day before the addition of differentiation medium without conditioning. Fusion was assessed 72 hours later. (d) Representative immunofluorescent images of C2C12s cultured for long or short durations in neutrophil conditioned medium, then induced to differentiate for 72h in low-serum media. Blue indicates nuclei (DAPI), and red indicates embryonic myosin heavy chain (MYH3). Scale shows 50 $\mu\text{m}$ . (e) Quantification of the number of myotubes as a percent of total cells after short or long exposure to neutrophil conditioned medium. \* $p < 0.05$  by two-sided, two-sample t-test after removal of one outlier.  $n = 29$  10X images taken from 3 culture wells. (f) Representative immunofluorescent images of primary myoblasts harvested 28-dpi following regenerative (2mm) and degenerative (3mm) defects and cultured in differentiation medium for 72 hours. Blue indicates nuclei (DAPI), and red indicates embryonic myosin heavy chain (MYH3). Scale bar shows 100 $\mu\text{m}$ . (g) Quantification of fusion index according to the fraction of nuclei located in myofibers containing at least two nuclei, calculated manually. \* $p$ -value  $< 0.05$  by two-sided, two-sample t-test, calculated from 20 10X images per defect and 3 mice per defect size, repeated twice. Cohen's  $d = 0.86$ , power = 0.75. (h) Fold change in *Myog* expression measured by qRT-PCR following in vitro differentiation of MuSCs isolated from 2mm and 3mm defects at 28-dpi. Bars show mean  $\pm$  SEM. \*\* $p < 0.01$  by two-sided, two-sample t-test ( $p = 0.02$ ,  $t = 3.3897$ ,  $df = 4$ ).  $n = 3-4$ . Replicates with  $Cq$  values  $> 30$  were excluded from further analysis.

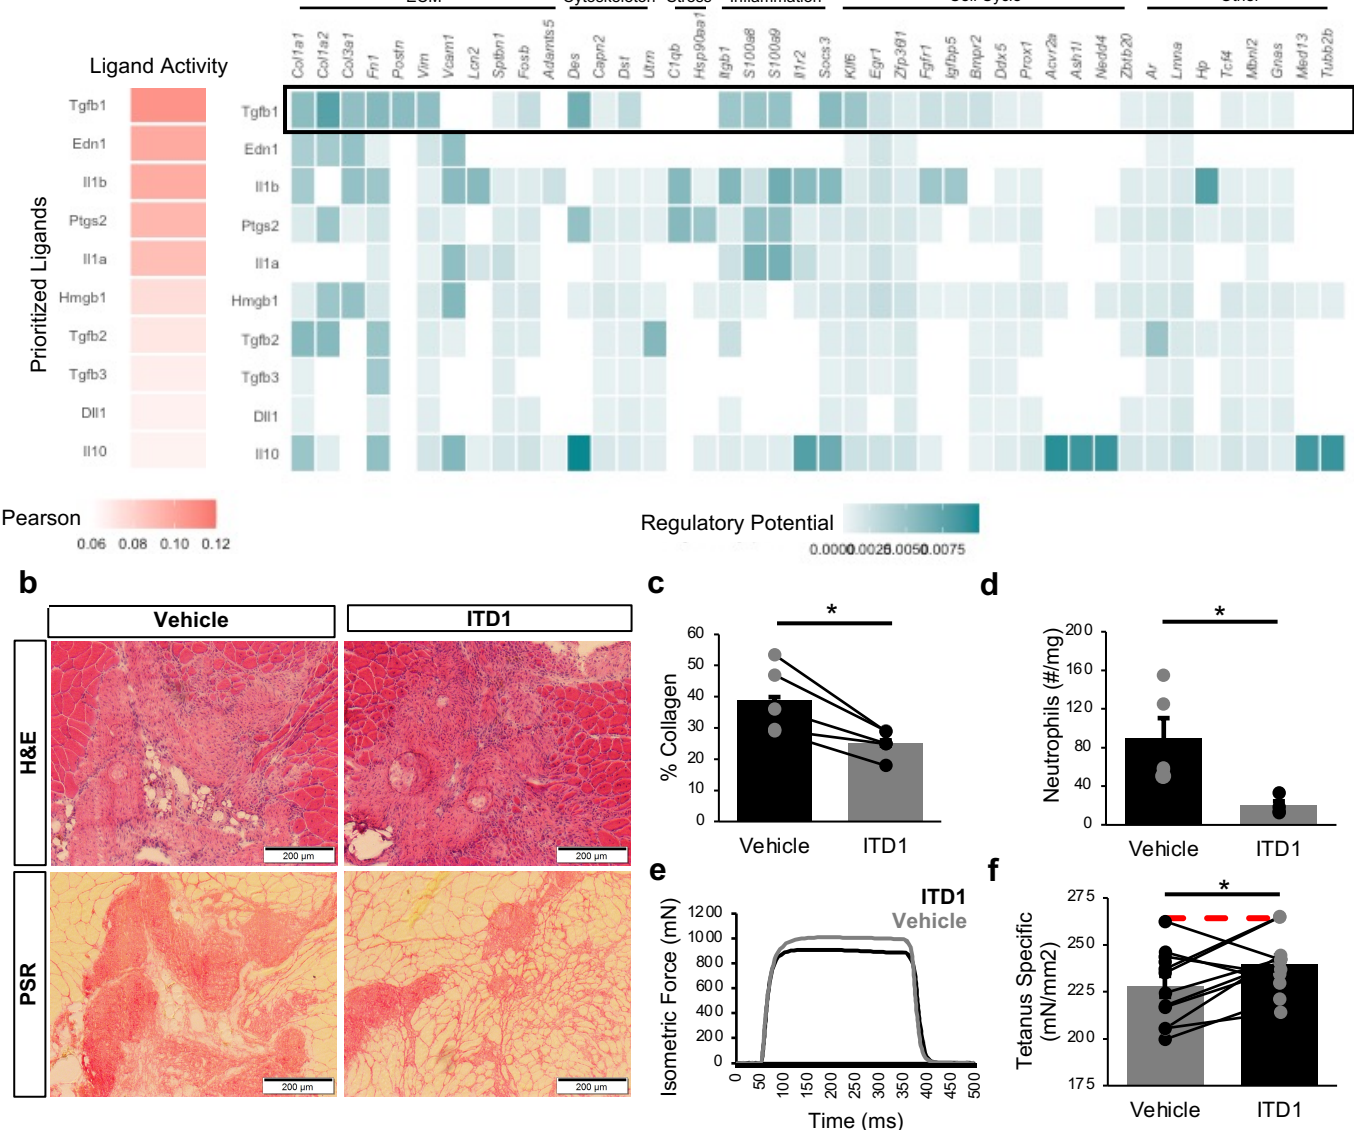

**Figure 6. Inhibition of TGFβ signaling partially restores muscle regeneration and reduces fibrosis after VML injury.** (a) NicheNet ranking of the ligands that best predict MuSC differential gene expression at 7-dpi. Pearson correlation coefficient indicates the ability of each ligand to predict the expression of differentially expressed genes. TGFβ1 is predicted to be a key contributor to MuSC dysfunction. (b) Representative H&E and PSR images from 3mm defects 28-dpi following intramuscular treatment with ITD1 (a TGFβ-signaling inhibitor) or vehicle every 3 days until 15-dpi. (c) Defects treated with ITD1 showed reduced collagen deposition. Collagen was calculated as a percent of the 10X magnification image of the defect that was stained red by PSR. n = 4 tissues per condition, where contralateral limbs were treated with vehicle. \*p<0.05 by two-sided, paired t-test. Bars show mean ± SEM. Effect size = 1.83. (d) Neutrophil abundance following ITD1 treatment, as quantified by flow cytometry 14-dpi, shows TGFβ signaling inhibition reduces neutrophil recruitment. Boxplots show mean ± SEM. n=4 defects. p=0.025 by two-sided, two-sample t-test. Cohen's d = 1.91. (e) Representative force curves for muscles treated with ITD1 or vehicle. (f) Specific force following muscle stimulation of injured tibialis anterior (TA) muscles 28-dpi is improved by ITD1 treatment. Bars show mean ± SEM, and red dashed line indicates specific force of uninjured, untreated TA muscles. p = 0.023 by two-sided, paired t-test. n = 10 muscles, Cohen's d = 1.1.

## Non-healing VML

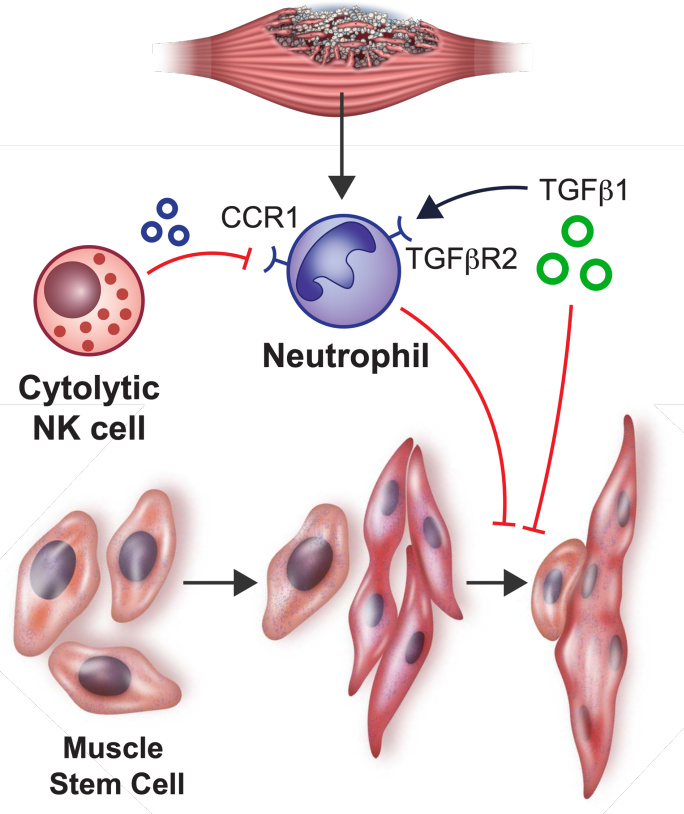

**Figure 7. Proposed communication network following non-healing VML injuries that impairs regeneration.**
